# Supplementary material for: Ultrathin Bi4O5Br2 nanosheets with surface oxygen vacancies and strong interaction with Bi2O2CO3 for highly efficient removal of water contaminants
Source: Royal Society of Chemistry journal article supplement (doi:10.1039/d1en01024g), 2022-01-01
Supplement: d1en01024g1.pdf [file d1en01024g1.pdf]

*Supporting Information*

*(24 pages)*

**Ultrathin Bi<sub>4</sub>O<sub>5</sub>Br<sub>2</sub> nanosheets with surface oxygen vacancies and strong interaction with Bi<sub>2</sub>O<sub>2</sub>CO<sub>3</sub> for highly efficient removal of water contaminants**

Lili Zhang,<sup>a</sup> Zhiqiang Wang,<sup>a</sup> Tong Li,<sup>b</sup> Chun Hu\*<sup>ab</sup> and Min Yang<sup>a</sup>

<sup>a</sup> Key Laboratory of Drinking Water Science and Technology, Research Center for Eco-Environmental Sciences, Chinese Academy of Sciences, Beijing, 100085, China

<sup>b</sup> Institute of Environmental Research at Greater Bay, Key Laboratory for Water Quality and Conservation of the Pearl River Delta, Ministry of Education, Guangzhou University, Guangzhou, 510006, China

Corresponding Author:

Chun Hu

Tel: +86 10 62843038

Fax: +86 10 62923541

Email: [huchun@rcees.ac.cn](mailto:huchun@rcees.ac.cn), [huchun@gzhu.edu.cn](mailto:huchun@gzhu.edu.cn).

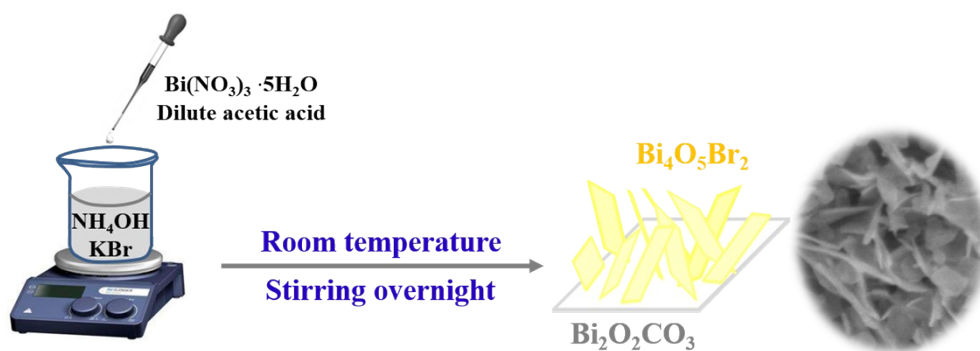

**Scheme S1** Schematic illustration of the facile synthetic process of  $\text{Bi}_4\text{O}_5\text{Br}_2/\text{Bi}_2\text{O}_2\text{CO}_3$ .

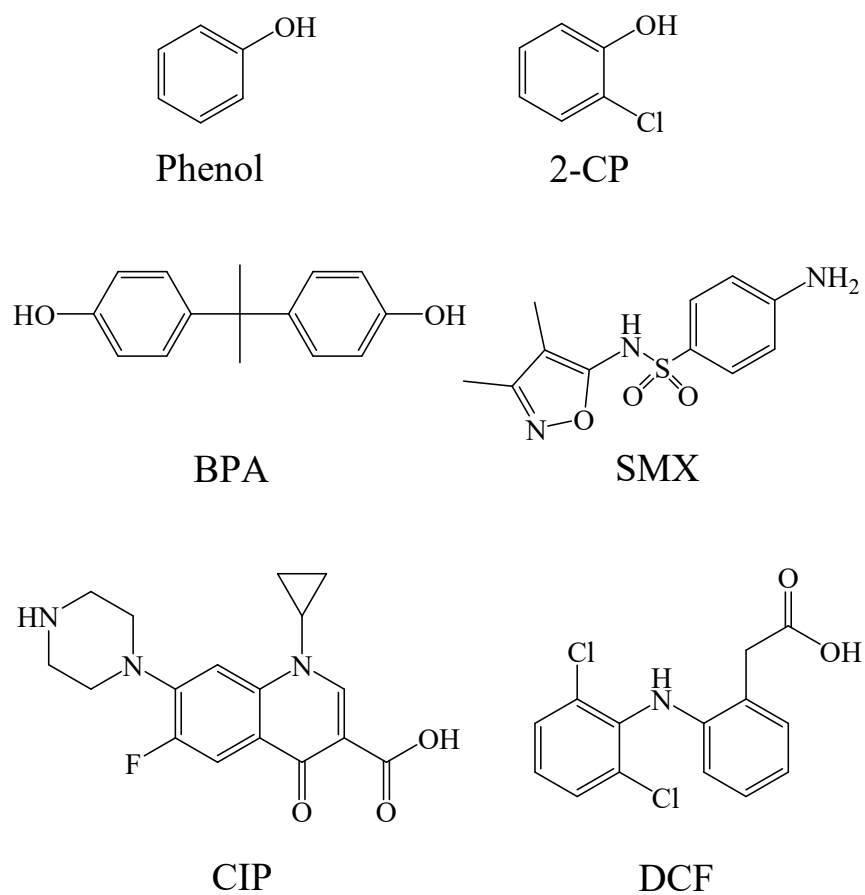

**Scheme S2** Structures of phenol, 2-chlorophenol (2-CP), bisphenol A (BPA), sulfamethoxazole (SMX), ciprofloxacin (CIP) and diclofenac (DCF).

**Table S1** Element composition of the  $\text{Bi}_4\text{O}_5\text{Br}_2/\text{Bi}_2\text{O}_2\text{CO}_3$  samples.

| Sample | Mass content of $\text{Bi}_4\text{O}_5\text{Br}_2$ |             | Br/Bi molar ratio |        |             |
|--------|----------------------------------------------------|-------------|-------------------|--------|-------------|
|        | Bulk (XRF)                                         | Bulk        | Surface           | Bulk   | Bulk        |
|        |                                                    | (IC+ICPOES) | (XPS)             | (XRF)  | (IC+ICPOES) |
| a      | 0 wt%                                              | 0 wt%       | 0                 | 0      | 0           |
| b      | 10.5 wt%                                           | 7.2 wt%     | 0.0424            | 0.0501 | 0.0341      |
| c      | 18.4 wt%                                           | 13.3 wt%    | 0.0664            | 0.0879 | 0.0633      |
| d      | 26.2 wt%                                           | 18.3 wt%    | 0.0949            | 0.1260 | 0.0878      |
| e      | 36.4 wt%                                           | 34.3 wt%    | 0.1465            | 0.1756 | 0.1655      |
| f      | 49.0 wt%                                           | 40.1 wt%    | 0.1946            | 0.2381 | 0.1941      |

**Table S2** The catalytic performance comparison of previously reported photocatalysts for pollutants degradation.

| Catalyst                                                                                       | Pollutant<br>(mg L <sup>-1</sup> ) | Removal<br>efficiency | Mineralization<br>efficiency | Operating<br>conditions | Ref       |
|------------------------------------------------------------------------------------------------|------------------------------------|-----------------------|------------------------------|-------------------------|-----------|
| Bi <sub>4</sub> O <sub>5</sub> Br <sub>2</sub> /Bi <sub>2</sub> O <sub>2</sub> CO <sub>3</sub> | 2-CP                               | 100%                  | 85 %                         | 5W LED                  | This work |
|                                                                                                | (10)                               | (60 min)              | (60 min)                     | (400-800 nm)            |           |
| Bi <sub>4</sub> O <sub>5</sub> Br <sub>2</sub> /Bi <sub>2</sub> O <sub>2</sub> CO <sub>3</sub> | BPA                                | 100%                  | 62%                          | 5W LED                  | This work |
|                                                                                                | (10)                               | (15 min)              | (60 min)                     | (400-800 nm)            |           |
| Pd/Bi <sub>4</sub> O <sub>5</sub> Br <sub>2</sub><br>(1.0 wt% Pd)                              | BPA                                | 95.8%                 | -                            | 5W white<br>LED light   | [S1]      |
|                                                                                                | (20)                               | (70 min)              |                              | (400-800 nm)            |           |
| graphene/g-C <sub>3</sub> N <sub>4</sub>                                                       | 2-CP                               | 85%                   | -                            | LED light               | [S2]      |
|                                                                                                | (10)                               | (60 min)              |                              | (400-800 nm)            |           |
| graphene/g-C <sub>3</sub> N <sub>4</sub>                                                       | BPA                                | 99%                   | 80%                          | LED light               | [S2]      |
|                                                                                                | (10)                               | (60 min)              | (60 min)                     | (400-800 nm)            |           |
| Bi-Bi <sub>2-δ</sub> MoO <sub>6-0.2</sub>                                                      | 2-CP                               | 89%                   | 61.7%                        | 150W Xe<br>lamp         | [S3]      |
|                                                                                                | (10)                               | (180 min)             | (180 min)                    | > 400 nm                |           |
| I <sub>0.30</sub> -Bi <sub>2</sub> WO <sub>6</sub>                                             | 2-CP                               | 100%                  | 72.9%                        | 150W Xe<br>lamp         | [S4]      |
|                                                                                                | (10)                               | (240 min)             | (300 min)                    | > 400 nm                |           |
| BiOI-110                                                                                       | BPA                                | 95%                   | 95%                          | 500 W Xe<br>lamp        | [S5]      |
|                                                                                                | (10)                               | (300 min)             | (300 min)                    |                         |           |
| BiOBr-OV                                                                                       | BPA                                | 35%                   | -                            | 300 W Xe                | [S6]      |

---

(10) (150 min)

---

lamp

**Table S3** The comparison for element ratio of the fresh and used  $\text{Bi}_4\text{O}_5\text{Br}_2/\text{Bi}_2\text{O}_2\text{CO}_3$ .

| <b>Atom</b> | <b>XPS</b>   |             | <b>EDS</b>   |             |
|-------------|--------------|-------------|--------------|-------------|
|             | <b>Fresh</b> | <b>Used</b> | <b>Fresh</b> | <b>Used</b> |
| C/Bi        | 0.7988       | 0.9092      | 1.4867       | 1.9983      |
| O/Bi        | 1.5189       | 1.6421      | 1.2362       | 2.4112      |
| Br/Bi       | 0.1465       | 0.1265      | 0.2405       | 0.2859      |

**Table S4** The main products during the photocatalytic degradation of DCF in Bi<sub>4</sub>O<sub>5</sub>Br<sub>2</sub>/Bi<sub>2</sub>O<sub>2</sub>CO<sub>3</sub> suspension at different reaction times, as detected by HPLC-QTOF-MS.

**0 min**

| Retention time (min)                         | Molecular structure                                                                 | Name                                                     | m/z |
|----------------------------------------------|-------------------------------------------------------------------------------------|----------------------------------------------------------|-----|
| Main products on the surface of the catalyst |                                                                                     |                                                          |     |
| 9.22                                         | 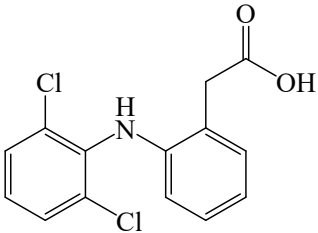   | 2-(2-((2,6-dichlorophenyl)amino)phenyl)acetic acid (DCF) | 294 |
| Main products in the aqueous solution        |                                                                                     |                                                          |     |
| 9.14                                         |  | 2-(2-((2,6-dichlorophenyl)amino)phenyl)acetic acid (DCF) | 294 |

**60 min**

| Retention time (min)                         | Molecular structure                                                                 | Name                                                     | m/z |
|----------------------------------------------|-------------------------------------------------------------------------------------|----------------------------------------------------------|-----|
| Main products on the surface of the catalyst |                                                                                     |                                                          |     |
| 9.17                                         | 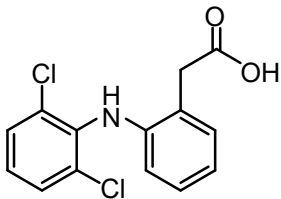 | 2-(2-((2,6-dichlorophenyl)amino)phenyl)acetic acid (DCF) | 294 |
| Main products in the aqueous solution        |                                                                                     |                                                          |     |



|      |  |                                                          |     |
|------|--|----------------------------------------------------------|-----|
| 7.70 |  | (2-((2-chlorophenyl)amino)phenyl)methyl aldehyde         | 228 |
| 8.10 |  | (2-((2,6-dichlorophenyl)amino)phenyl)methanol            | 266 |
| 9.16 |  | 2-(2-((2,6-dichlorophenyl)amino)phenyl)acetic acid (DCF) | 294 |

### 180 min

| Retention time (min)                         | Molecular structure | Name                                                     | m/z |
|----------------------------------------------|---------------------|----------------------------------------------------------|-----|
| Main products on the surface of the catalyst |                     |                                                          |     |
| 9.17                                         |                     | 2-(2-((2,6-dichlorophenyl)amino)phenyl)acetic acid (DCF) | 294 |
| Main products in the aqueous solution        |                     |                                                          |     |
| 3.51                                         |                     | 2,6-dichloroaniline                                      | 160 |
| 5.06                                         |                     | 2,4-dihydroxy-6-methylaniline                            | 138 |

|      |                                                                                    |                                                          |     |
|------|------------------------------------------------------------------------------------|----------------------------------------------------------|-----|
| 6.06 | 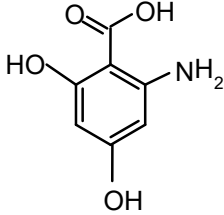  | 2,4-dihydroxy-6-aminobenzoic acid                        | 168 |
| 7.64 |   | (2-((2-chlorophenyl)amino)phenyl)methyl aldehyde         | 228 |
| 8.10 |   | (2-((2,6-dichlorophenyl)amino)phenyl)methanol            | 266 |
| 9.15 |  | 2-(2-((2,6-dichlorophenyl)amino)phenyl)acetic acid (DCF) | 294 |

---

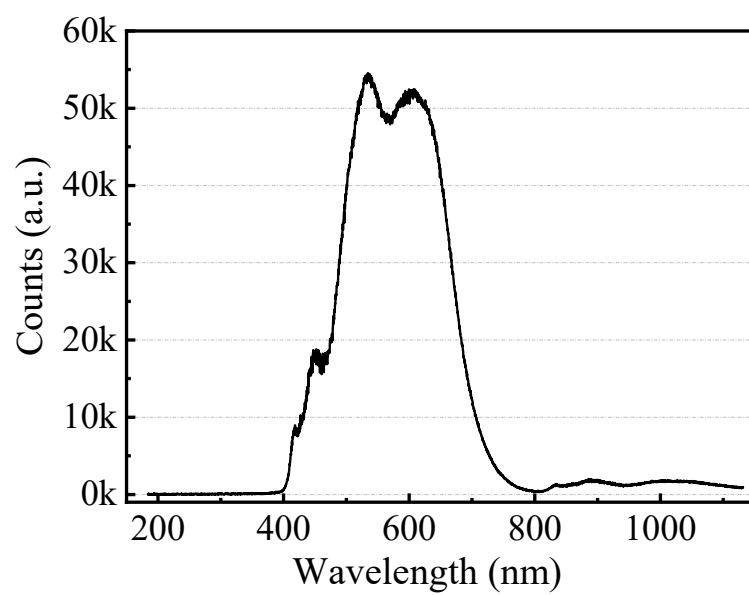

**Fig. S1** Spectral distribution of the LED lamp bead used in this work.

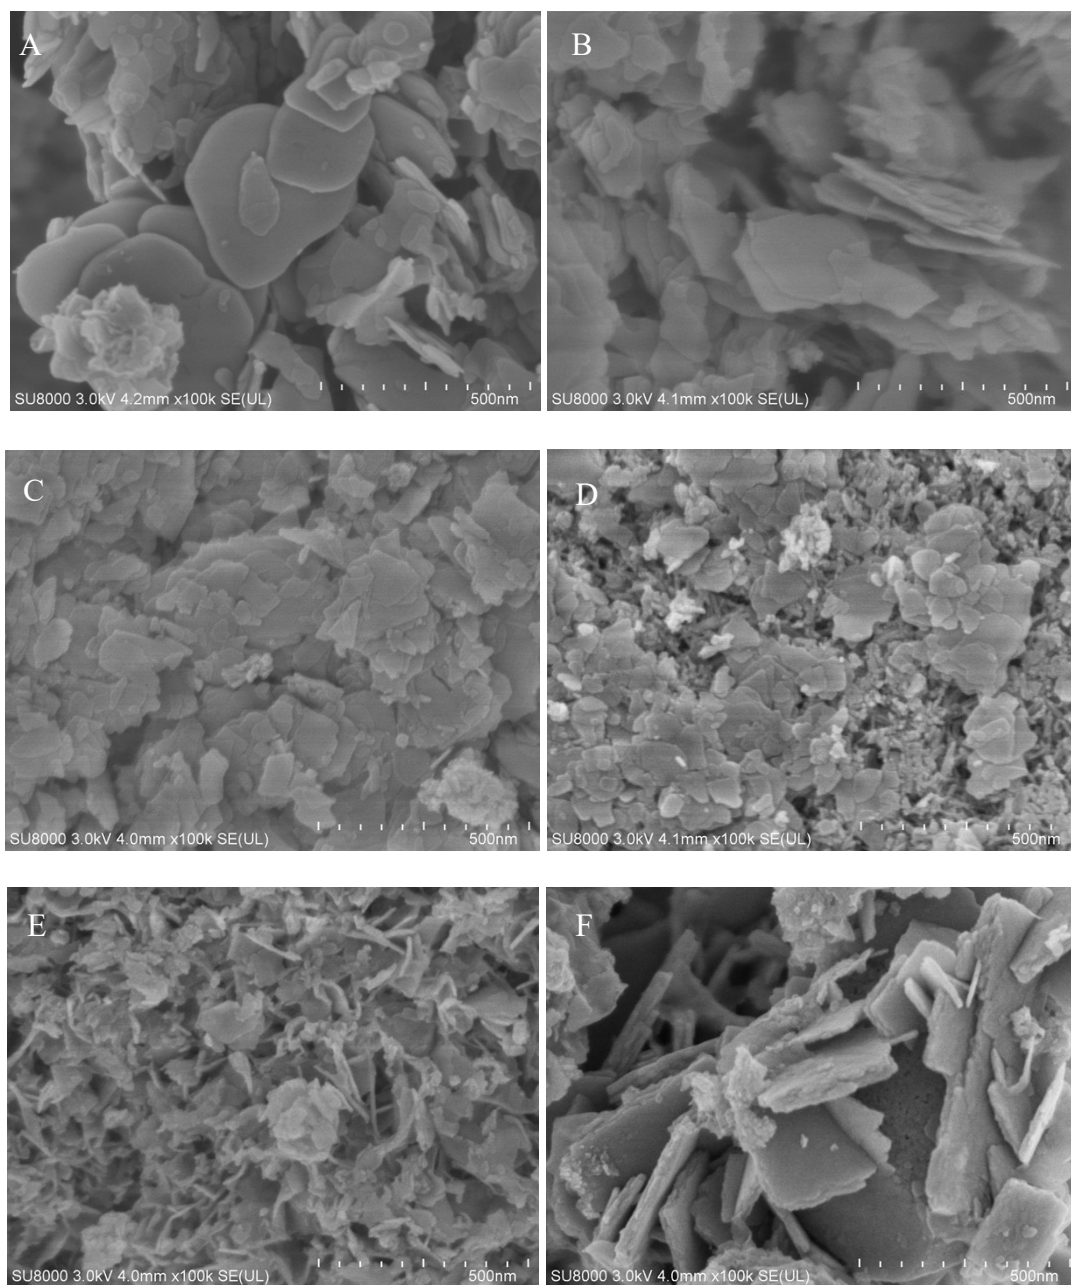

**Fig. S2** SEM images of (A)  $\text{Bi}_2\text{O}_2\text{CO}_3$ , (B-E) 10.5, 18.4, 26.2, and 49.0 wt%  $\text{Bi}_4\text{O}_5\text{Br}_2/\text{Bi}_2\text{O}_2\text{CO}_3$ , (F)  $\text{Bi}_4\text{O}_5\text{Br}_2$ .

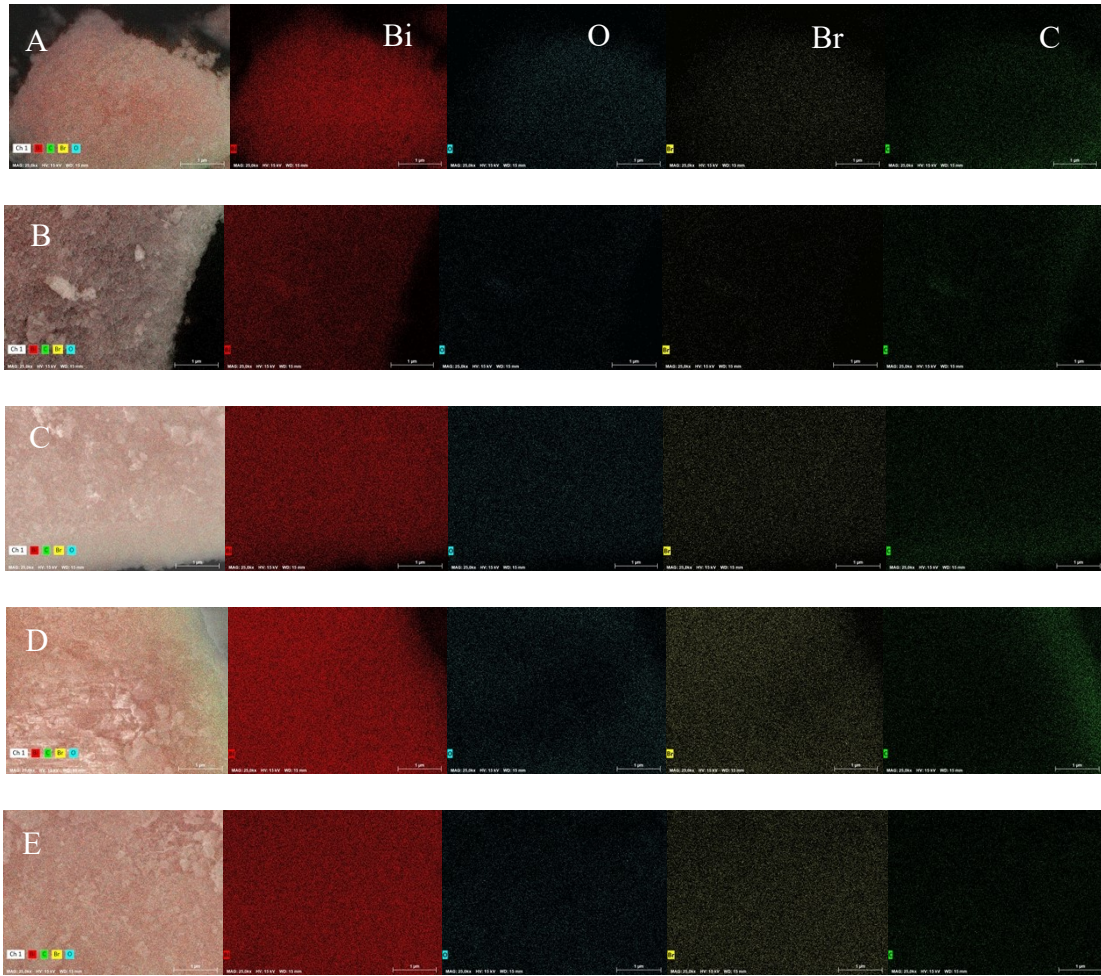

**Fig. S3** SEM elemental mapping results of (A-E) 10.5-49.0 wt%  $\text{Bi}_4\text{O}_5\text{Br}_2/\text{Bi}_2\text{O}_2\text{CO}_3$ .

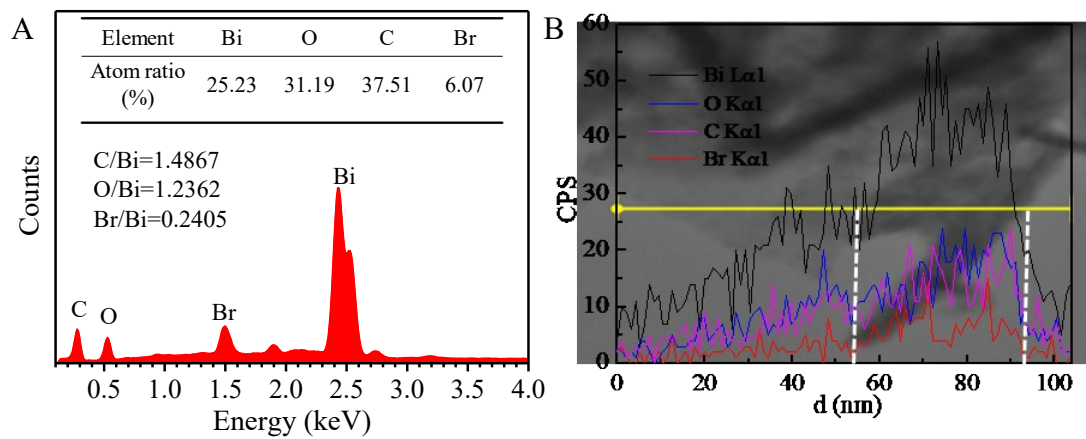

**Fig. S4** (A) SEM EDS spectrum, and (B) TEM line scan spectra of  $\text{Bi}_4\text{O}_5\text{Br}_2/\text{Bi}_2\text{O}_2\text{CO}_3$ .

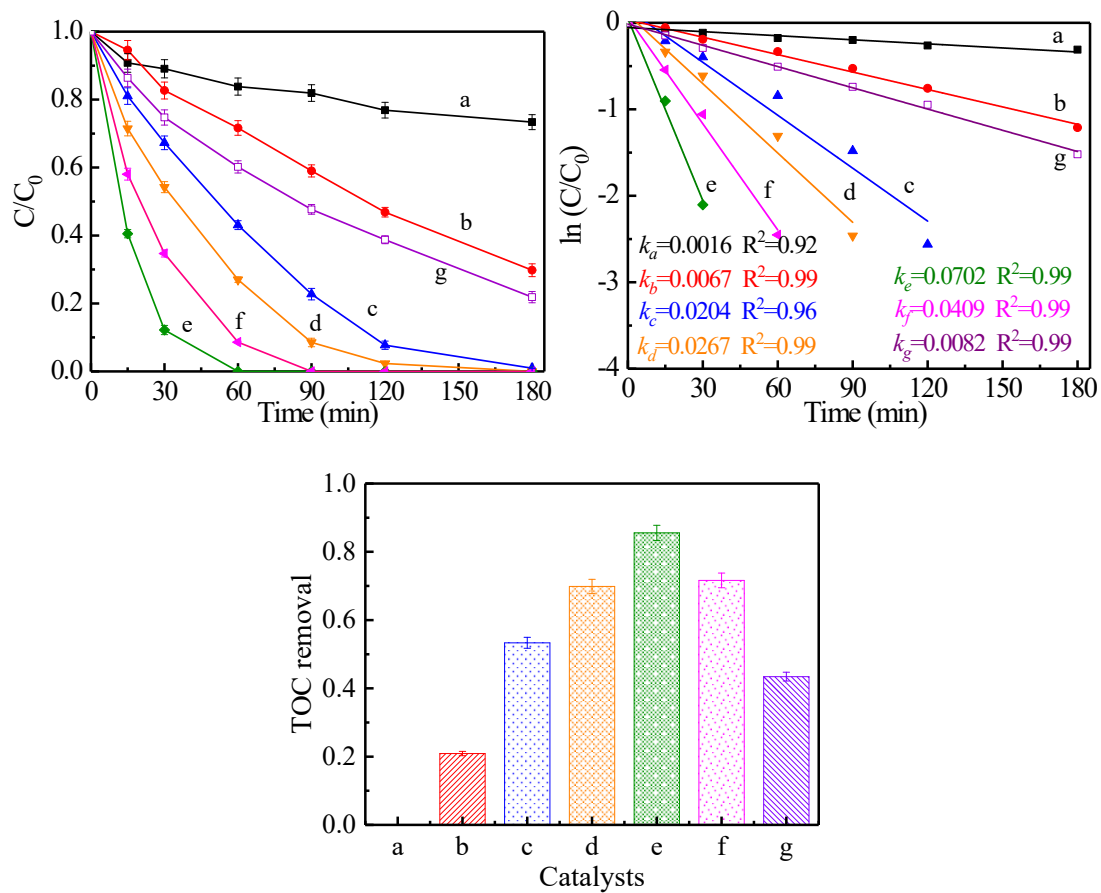

**Fig. S5** 2-CP degradation, kinetics, and TOC removal in different suspensions: (a)  $\text{Bi}_2\text{O}_2\text{CO}_3$ , (b-f) 10.5-49.0 wt%  $\text{Bi}_4\text{O}_5\text{Br}_2/\text{Bi}_2\text{O}_2\text{CO}_3$ , (g)  $\text{Bi}_4\text{O}_5\text{Br}_2$ . Experimental condition:  $[\text{2-CP}]_0=10 \text{ mg L}^{-1}$ , catalyst dosage= $1.6 \text{ g L}^{-1}$ , light source: visible LED.

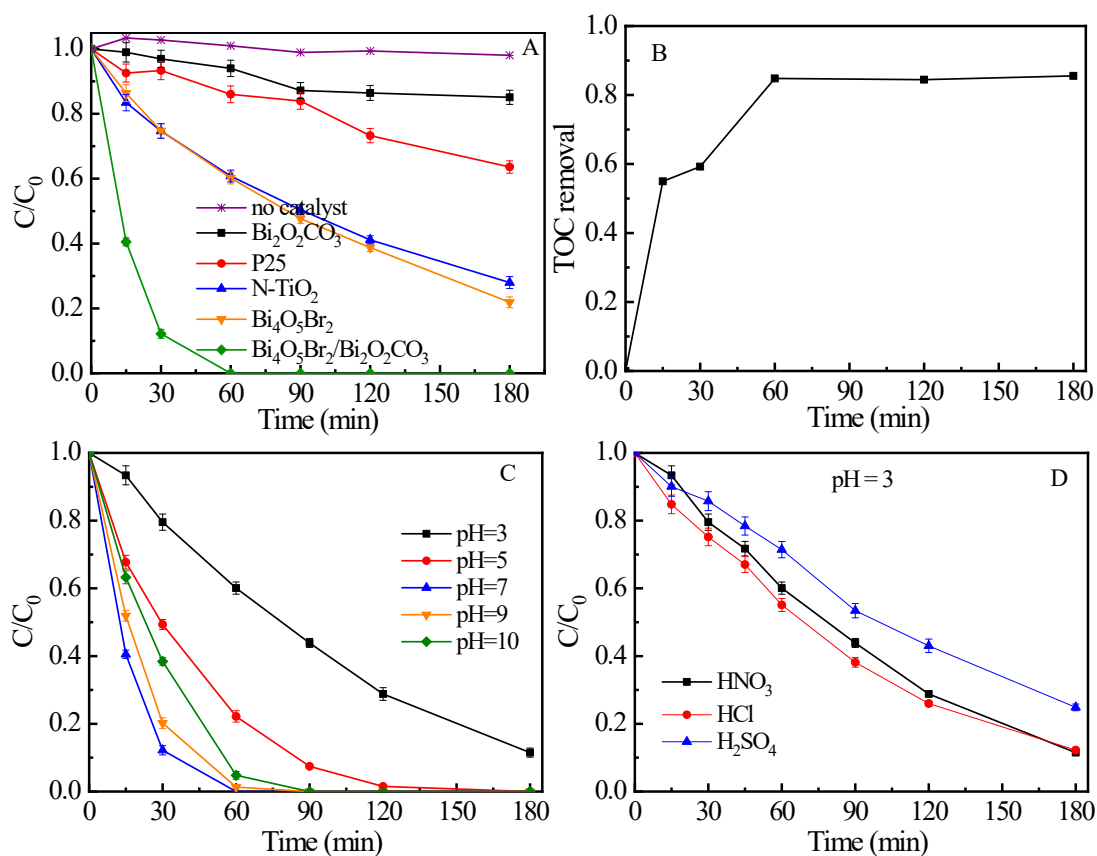

**Fig. S6** (A) The comparison of 2-CP degradation for different catalysts, (B) TOC removal curve over time, (C) Effect of pH on degradation of 2-CP by  $\text{Bi}_4\text{O}_5\text{Br}_2/\text{Bi}_2\text{O}_2\text{CO}_3$ , and (D) Effect of the pH regulating solutes. Experimental condition:  $[\text{2-CP}]_0 = 10 \text{ mg L}^{-1}$ , catalyst dosage =  $1.6 \text{ g L}^{-1}$ , light source: visible LED.



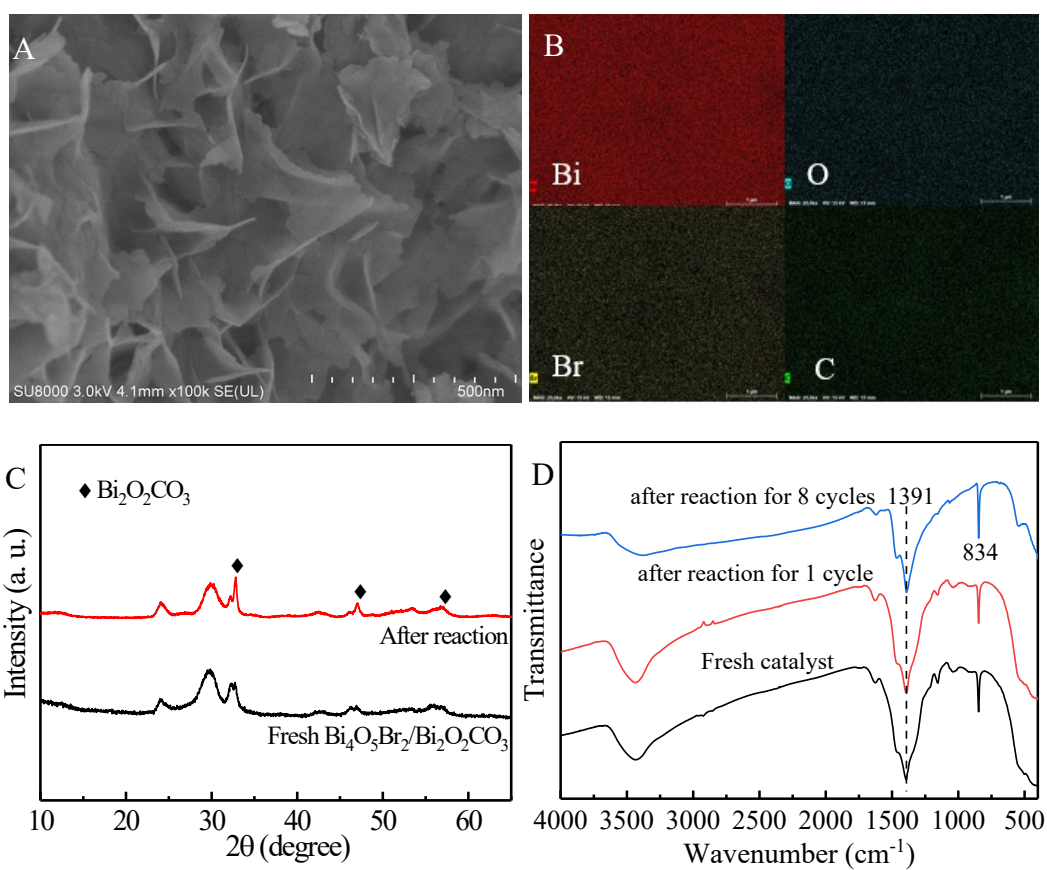

**Fig. S7** SEM image, elemental mapping, XRD and FTIR spectra of  $\text{Bi}_4\text{O}_5\text{Br}_2/\text{Bi}_2\text{O}_2\text{CO}_3$  after reaction.

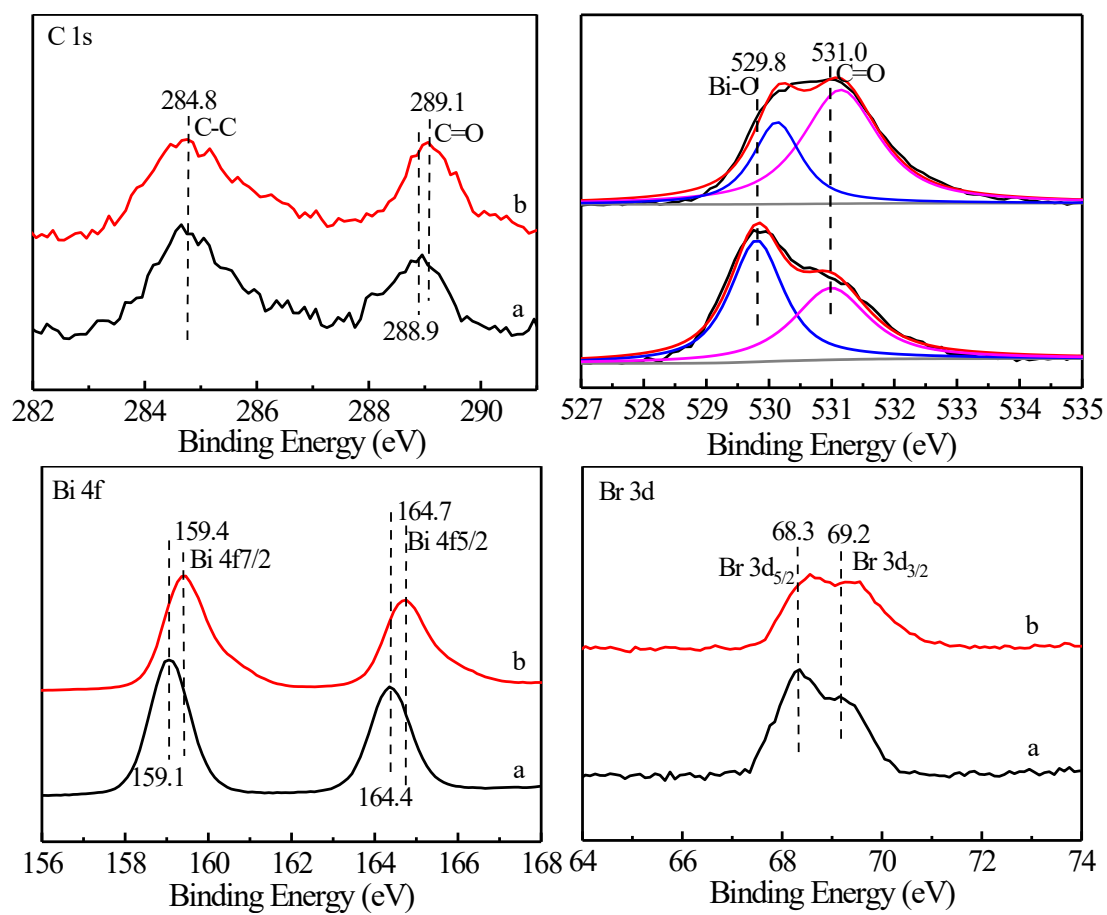

**Fig. S8** The high-resolution C 1s, O 1s, Bi 4f and Br 3d XPS spectra of  $\text{Bi}_4\text{O}_5\text{Br}_2/\text{Bi}_2\text{O}_2\text{CO}_3$ : (a) before and (b) after reaction.

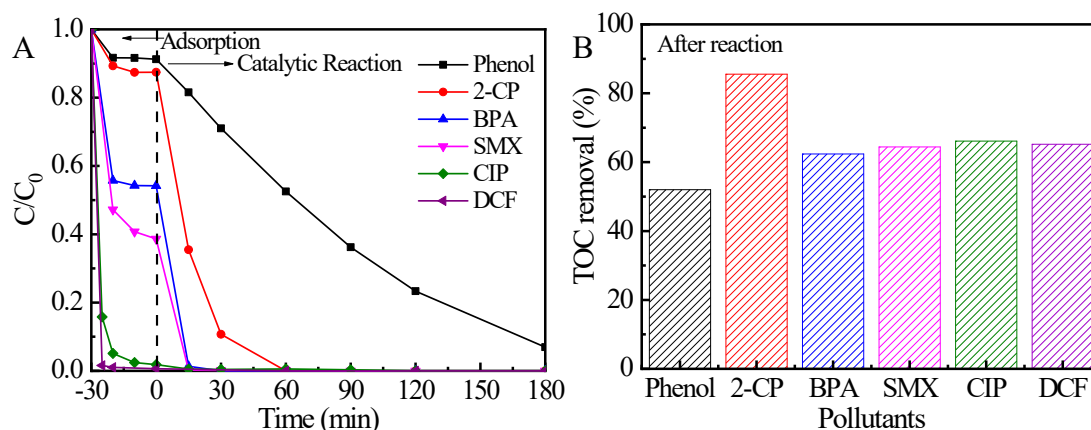

**Fig. S9** (A) Adsorption and degradation of different pollutants; (B) The corresponding TOC removal in  $\text{Bi}_4\text{O}_5\text{Br}_2/\text{Bi}_2\text{O}_2\text{CO}_3$  suspension. Experimental condition:  $[\text{Pollutant}]_0=10 \text{ mg L}^{-1}$  or  $[\text{DCF}]_0=24.8 \text{ mg L}^{-1}$ , catalyst dosage= $1.6 \text{ g L}^{-1}$ , light source: visible LED.

### Degradation process of various pollutants

$\text{Bi}_4\text{O}_5\text{Br}_2/\text{Bi}_2\text{O}_2\text{CO}_3$  showed satisfactory treatment performance for various pollutants, such as phenol, bisphenol A (BPA), sulfamethoxazole (SMX), ciprofloxacin (CIP) and diclofenac (DCF). The removal process of these typical pollutants over  $\text{Bi}_4\text{O}_5\text{Br}_2/\text{Bi}_2\text{O}_2\text{CO}_3$  under visible LED was investigated. As illustrated in Fig. S9, around 10% of adsorption for phenol and 2-CP (both with a hydroxyl group), 46% of adsorption for BPA (with two hydroxyl groups), 60% of adsorption for SMX (with a sulfanilamide group), and nearly complete adsorption for CIP and DCF (both with a carboxylic acid group) were observed. The results indicated that the functional groups of pollutants are key for their adsorption on  $\text{Bi}_4\text{O}_5\text{Br}_2/\text{Bi}_2\text{O}_2\text{CO}_3$ . Accordingly, complete removal of phenol substrate from water needed more than 180 min reaction, while only 60 min or about 15 min was required for 2-CP or BPA and SMX. For CIP and DCF, no desorption was observed during 180 min reaction under visible LED. The solution TOC removal reached over 60% for nearly all the tested pollutants.

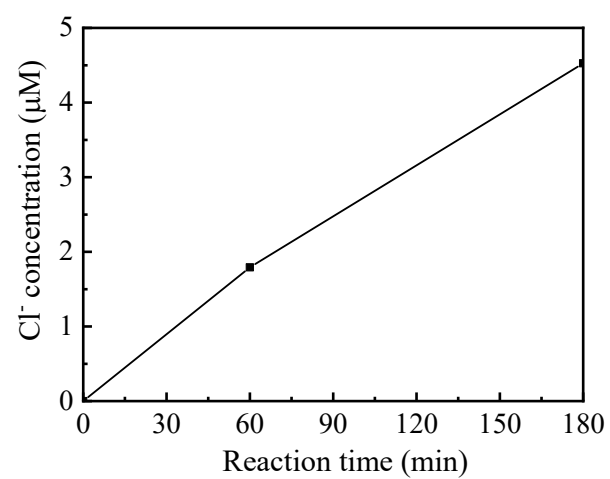

**Fig. S10** The generation of Cl<sup>-</sup> during DCF degradation.

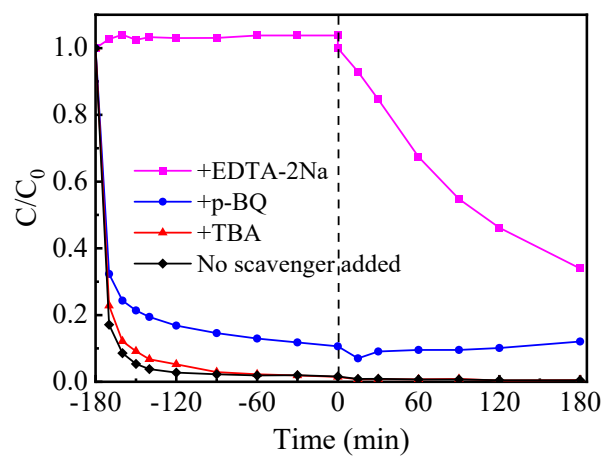

**Fig. S11** Effect of reactive species scavengers on DCF degradation in  $\text{Bi}_4\text{O}_5\text{Br}_2/\text{Bi}_2\text{O}_2\text{CO}_3$  suspension under visible LED.

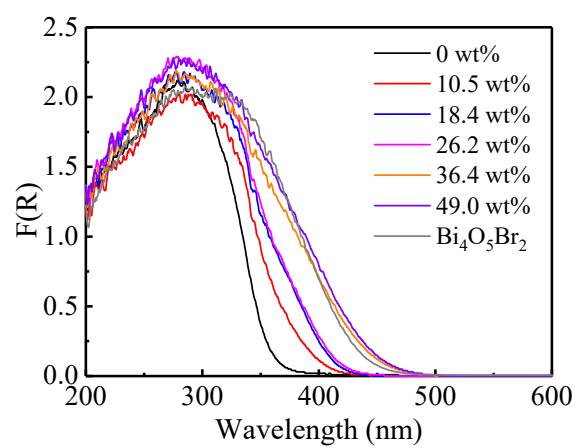

**Fig. S12** Spectral absorbance of Bi<sub>4</sub>O<sub>5</sub>Br<sub>2</sub>/Bi<sub>2</sub>O<sub>2</sub>CO<sub>3</sub> with various Bi<sub>4</sub>O<sub>5</sub>Br<sub>2</sub> weight percentages.

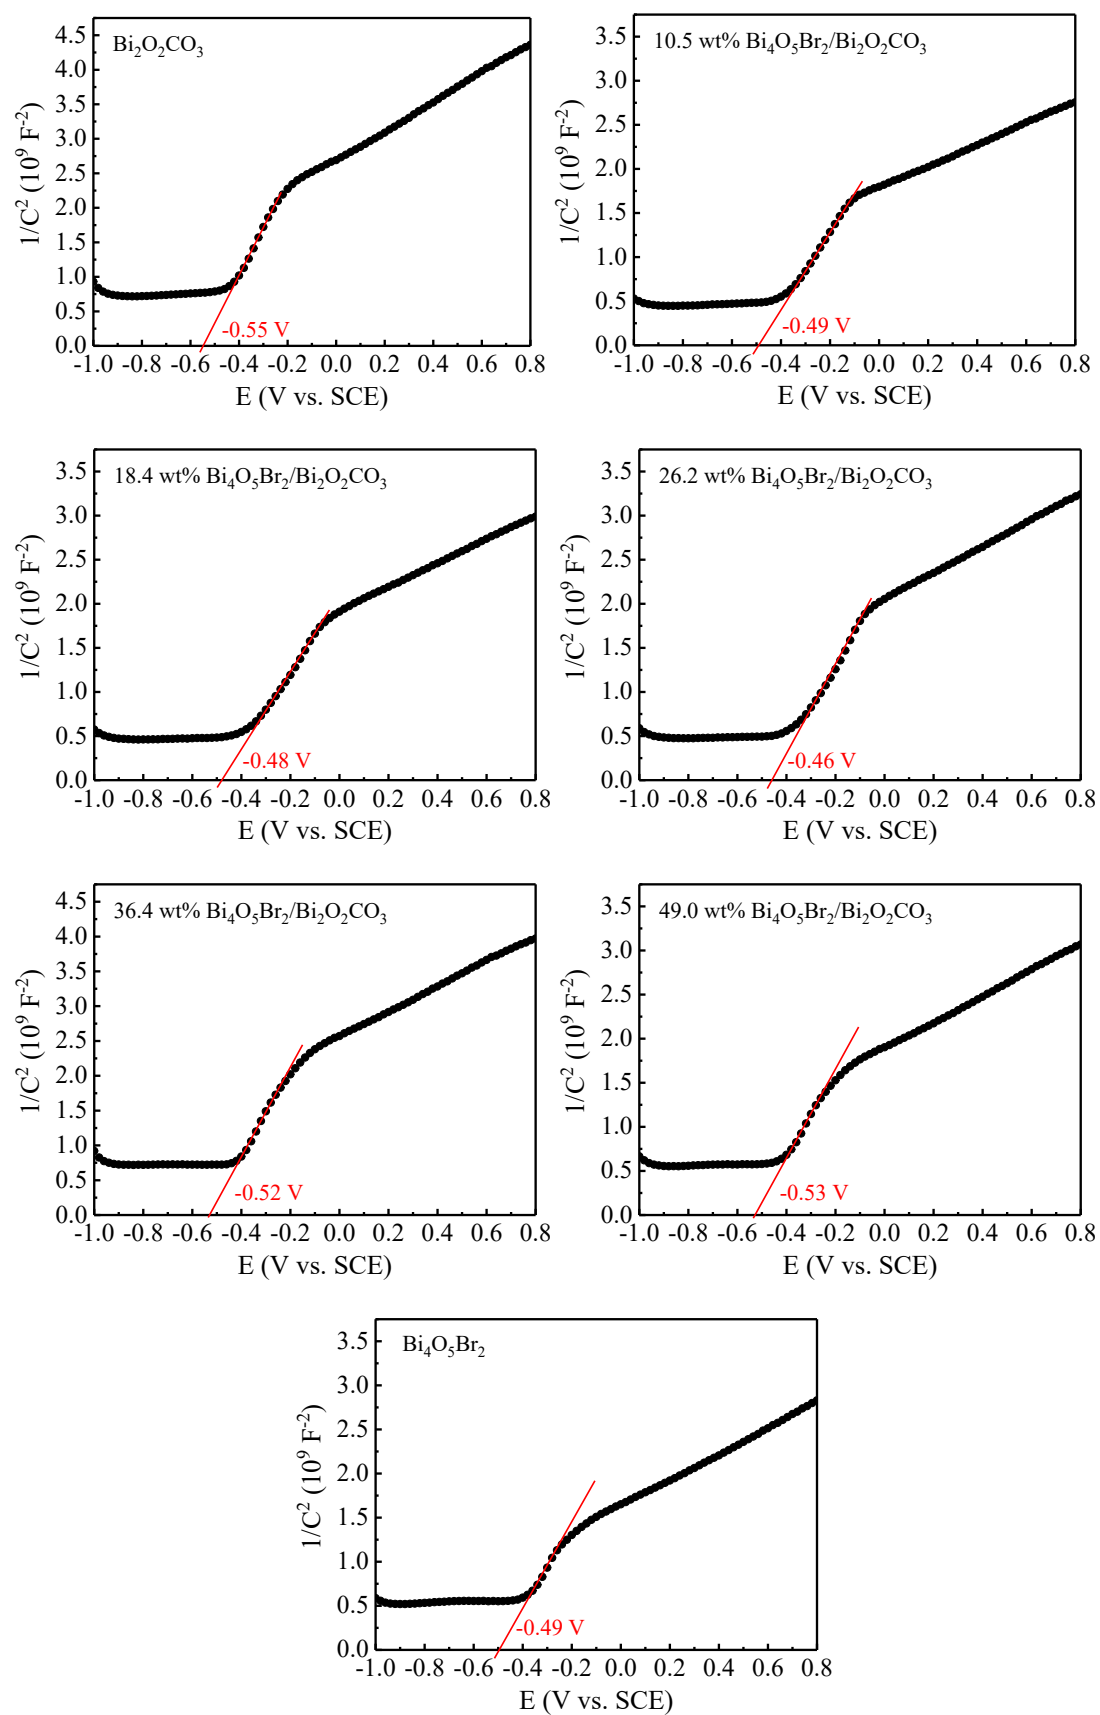

**Fig. S13** The Mott-Schottky plots of  $\text{Bi}_4\text{O}_5\text{Br}_2/\text{Bi}_2\text{O}_2\text{CO}_3$  with various  $\text{Bi}_4\text{O}_5\text{Br}_2$  weight percentages in 0.1 M  $\text{Na}_2\text{SO}_4$  aqueous solution (pH 6.60).

## References

- S1 N. Li, G. Zhu, M. Hojamberdiev, R. Zhu, J. Chang, J. Gao, Q. Guo, P. Liu, Pd nanoparticle-decorated  $\text{Bi}_4\text{O}_5\text{Br}_2$  nanosheets with enhanced visible-light photocatalytic activity for degradation of bisphenol A, *J. Photochem. Photobiol. A: Chem.* 356, (2018) 440–450.
- S2 F. Li, M. Tang, T. Li, L. Zhang, C. Hu, Two-dimensional graphene/g- $\text{C}_3\text{N}_4$  in-plane hybrid heterostructure for enhanced photocatalytic activity with surface-adsorbed pollutants assistant, *Appl. Catal. B: Environ.* 268 (2020) 118397.
- S3 L. Zhang, Z. Wang, C. Hu, B. Shi, Enhanced photocatalytic performance by the synergy of Bi vacancies and  $\text{Bi}^0$  in  $\text{Bi}^0\text{-Bi}_{2-\delta}\text{MoO}_6$ , *Appl. Catal. B: Environ.* 257 (2019) 117785.
- S4 L. Wang, Z. Wang, L. Zhang, C. Hu, Enhanced photoactivity of  $\text{Bi}_2\text{WO}_6$  by iodide insertion into the interlayer for water purification under visible Light, *Chem. Eng. J.* 352 (2018) 664–672.
- S5 M. Pan, H. Zhang, G. Gao, L. Liu, W. Chen, Facet-dependent catalytic activity of nanosheet-assembled bismuth oxyiodide microspheres in degradation of bisphenol A, *Environ. Sci. Technol.* 49 (2015) 6240–6248.
- S6 X. Shi, P. Wang, L. Wang, Y. Bai, H. Xie, Y. Zhou, J. A. Wang, Z. Li, L. Qu, M. Shi, L. Ye, Few layered  $\text{BiOBr}$  with expanded interlayer spacing and oxygen vacancies for efficient decomposition of real oil field produced wastewater, *ACS Sustainable Chem. Eng.* 6 (2018) 13739–13746.
